# Supplementary material for: Mapping Geospatial Processes Affecting the Environmental Fate of Agricultural Pesticides in Africa
Source: PubMed Central journal article supplement (PMC6801543; doi:10.3390/ijerph16193523), 2019-09-20
Supplement: ijerph-16-03523-s001.pdf [file ijerph-16-03523-s001.pdf]

## Supplementary Materials

**Table S1.** In total, 24 pesticide fate models were selected. The variables that were used in each pesticide fate model are indicated by ‘x’ (Table 1).

|    | Model                                       | Advection | Baseflow | By-pass flow | Convection | Deposition | Diffusion | Dispersion/dissolution | Dissipation | Evapo-transpiration | Infiltration |
|----|---------------------------------------------|-----------|----------|--------------|------------|------------|-----------|------------------------|-------------|---------------------|--------------|
| 1  | BASINS                                      |           |          |              |            |            |           |                        |             |                     | x            |
| 2  | CASCADE-TOXSWA                              |           |          |              |            |            |           |                        |             |                     | x            |
| 3  | Chemical fate model                         | x         |          |              |            | x          |           |                        |             |                     | x            |
| 4  | CliMoChem                                   | x         |          |              |            |            | x         |                        |             |                     |              |
| 5  | CoZMo-POP-2 model                           | x         |          |              |            |            |           | x                      |             | x                   |              |
| 6  | CRACK-NP                                    |           |          | x            |            |            |           |                        |             |                     | x            |
| 7  | Dynamic multimedia environmental fate model |           |          |              |            | x          | x         | x                      |             |                     | x            |
| 8  | EPIC                                        |           |          |              |            |            |           |                        |             | x                   |              |
| 9  | GIBSI                                       |           |          |              |            |            |           |                        |             |                     | x            |
| 10 | GLEAMS                                      |           |          |              |            |            |           |                        | x           | x                   | x            |
| 11 | HSCTM-2D                                    | x         |          |              |            | x          | x         | x                      |             |                     |              |
| 12 | LEACHM                                      |           |          |              |            |            |           |                        |             | x                   | x            |
| 13 | MACRO                                       |           | x        |              | x          |            | x         |                        |             | x                   | x            |
| 14 | OPUS                                        |           |          |              |            |            |           |                        |             | x                   | x            |
| 15 | PEARL                                       |           | x        |              | x          |            | x         | x                      | x           | x                   | x            |
| 16 | PELMO                                       |           | x        |              |            |            |           | x                      |             |                     | x            |
| 17 | PESTLA                                      |           | x        |              | x          |            |           | x                      |             |                     | x            |
| 18 | PLM                                         |           |          | x            |            |            | x         |                        |             | x                   | x            |
| 19 | PRIMET                                      |           |          |              |            |            |           |                        |             | x                   | x            |
| 20 | PRZM                                        | x         |          |              |            |            | x         | x                      |             |                     | x            |

| 21 | RZWQM                                       |                     | x           | x            |          |                |                                |                | x        | x             | x          |
|----|---------------------------------------------|---------------------|-------------|--------------|----------|----------------|--------------------------------|----------------|----------|---------------|------------|
| 22 | SESOIL                                      | x                   |             |              |          | x              | x                              |                |          | x             | x          |
| 23 | SIMULAT                                     |                     |             | x            |          |                |                                |                | x        | x             | x          |
| 24 | SWAT                                        |                     |             |              |          |                |                                |                |          |               | x          |
|    | Model                                       | Lateral throughflow | Percolation | Plant uptake | Sorption | Surface runoff | Transformation and degradation | Volatilization | Wash-off | Water erosion | Wind drift |
| 1  | BASINS                                      |                     | x           |              | x        | x              |                                |                | x        |               |            |
| 2  | CASCADE-TOXSWA                              |                     | x           |              |          | x              |                                |                |          | x             | x          |
| 3  | Chemical fate model                         |                     | x           |              |          | x              | x                              |                | x        |               |            |
| 4  | CliMoChem                                   |                     |             |              |          |                | x                              | x              |          |               |            |
| 5  | CoZMo-POP-2 model                           | x                   |             | x            | x        | x              | x                              | x              | x        |               |            |
| 6  | CRACK-NP                                    |                     | x           |              | x        |                |                                |                |          |               |            |
| 7  | Dynamic multimedia environmental fate model |                     | x           |              |          |                | x                              | x              |          |               | x          |
| 8  | EPIC                                        |                     |             |              |          | x              |                                |                |          | x             | x          |
| 9  | GIBSI                                       |                     |             |              |          | x              |                                |                |          | x             |            |
| 10 | GLEAMS                                      |                     | x           |              |          | x              |                                |                | x        |               |            |
| 11 | HSCTM-2D                                    |                     |             |              | x        |                | x                              |                |          | x             |            |
| 12 | LEACHM                                      |                     | x           | x            | x        | x              |                                |                |          |               |            |
| 13 | MACRO                                       | x                   | x           |              | x        | x              | x                              |                |          |               |            |
| 14 | OPUS                                        |                     | x           |              |          | x              | x                              |                |          | x             |            |
| 15 | PEARL                                       |                     | x           | x            |          |                | x                              | x              | x        |               |            |
| 16 | PELMO                                       |                     | x           | x            | x        | x              | x                              | x              | x        | x             |            |
| 17 | PESTLA                                      |                     | x           |              | x        |                | x                              |                |          |               |            |
| 18 | PLM                                         |                     | x           |              | x        |                | x                              |                |          |               |            |
| 19 | PRIMET                                      |                     | x           |              |          | x              |                                | x              |          |               | x          |
| 20 | PRZM                                        |                     | x           | x            | x        | x              | x                              |                |          | x             |            |
| 21 | RZWQM                                       |                     | x           | x            | x        | x              |                                | x              |          |               |            |

|    |         |   |   |   |   |   |   |   |
|----|---------|---|---|---|---|---|---|---|
| 22 | SESOIL  | x | x | x | x | x | x | x |
| 23 | SIMULAT |   |   | x |   |   |   |   |
| 24 | SWAT    | x | x | x |   |   | x | x |

**Table S2.** How often a variable was used in the selected pesticide fate models and the processes that were mapped in this study.

| Variables                      | # models that use this variable | Processes that were mapped in this study          |
|--------------------------------|---------------------------------|---------------------------------------------------|
| Infiltration                   | 20                              | Leaching                                          |
| Percolation                    | 18                              | Leaching                                          |
| Surface runoff                 | 17                              | Surface runoff generation, transfer, accumulation |
| Transformation and degradation | 13                              |                                                   |
| Sorption                       | 13                              | Soil storage and filtering capacity               |
| Evapotranspiration             | 12                              | Volatilization                                    |
| Water erosion                  | 9                               | Erosion                                           |
| Volatilization                 | 8                               | Volatilization                                    |
| Diffusion                      | 8                               |                                                   |
| Dispersion                     | 7                               |                                                   |
| Wash-off                       | 8                               |                                                   |
| Advection                      | 6                               |                                                   |
| Plant uptake                   | 6                               |                                                   |
| Base flow                      | 5                               |                                                   |
| By-pass flow                   | 4                               |                                                   |
| Deposition                     | 4                               |                                                   |
| Dissipation                    | 4                               |                                                   |
| Wind drift                     | 4                               |                                                   |
| Convection                     | 3                               |                                                   |
| Lateral through flow           | 2                               |                                                   |

**Table S3.** Additional information on the existing geospatial datasets that were used in this study for creating maps of the processes associated with pesticide fate after spraying.

| Property                     | Unit           | Database               | Spatial resolution | Spatial coverage   | Temporal resolution | Temporal coverage           | Source |
|------------------------------|----------------|------------------------|--------------------|--------------------|---------------------|-----------------------------|--------|
| Cation Exchange Capacity     | cmol + /kg     | SoilGrids              | 30-arc second      | Sub-Saharan Africa | Static              |                             | [1]    |
| Clay content                 | %              | SoilGrids              | 30-arc second      | Sub-Saharan Africa | Static              |                             | [1]    |
| Depth to bedrock             | cm             | SoilGrids              | 30-arc second      | Sub-Saharan Africa | Static              |                             | [1]    |
| Elevation                    | m              | SRTM-DEM               | 3 arc-second       | Global             | Static              |                             | [2]    |
| Enhanced Vegetation Index    | --             | Weiss et al., 2014     | 30-arc second      | Global             | Static              |                             | [3]    |
| Flow accumulation            | m              | HydroSHEDS             | 30 arc-second      | Global             | Static              |                             | [4]    |
| Groundwater depth            | m              |                        | 30-arc second      | Global             | Static              |                             | [5]    |
| Land use class               | --             | MCD12Q1                | 30-arc second      | Global             | Yearly              | 2001–2012                   | [6]    |
| Potential Evapotranspiration | mm/month       | CGIAR-CSI GeoPortal    | 30-arc second      | Global             | Static              | Long-term average 1950-2000 | [7]    |
| Rainfall erosivity           | MJ·mm/ha/ h/yr | USLE                   | 30 arc-second      | Global             | Static              |                             | [8]    |
| Relative humidity            | %              | Global Forecast System | 15 arc-minute      | Global             | 16-day              | 2015-present                | [9]    |
| Sand content                 | %              | SoilGrids              | 30-arc second      | Sub-Saharan Africa | Static              |                             | [1]    |
| Silt content                 | %              | SoilGrids              | 30-arc second      | Sub-Saharan Africa | Static              |                             | [1]    |
| Slope                        | °              | SRTM-DEM               | 3 arc-second       | Global             | Static              |                             | [2]    |
| Soil drainage class          | --             | AfSoilGrids250m        | 30-arc second      | Sub-Saharan Africa | Static              |                             | [10]   |

| Soil moisture                  | mm                     | NASA-USDA<br>SMAP Global<br>Soil Moisture<br>Data | 15 arc-<br>second     | Global                | 3-days                              | 2015 -<br>present    | [11]   |
|--------------------------------|------------------------|---------------------------------------------------|-----------------------|-----------------------|-------------------------------------|----------------------|--------|
| Soil organic matter<br>content | ‰                      | SoilGrids                                         | 30-arc<br>second      | Sub-Saharan<br>Africa |                                     |                      | [1]    |
| Property                       | Unit                   | Database                                          | Spatial<br>resolution | Spatial<br>coverage   | Temporal<br>resolution              | Temporal<br>coverage | Source |
| Soil pH in H <sub>2</sub> O    | --                     | SoilGrids                                         | 30-arc<br>second      | Sub-Saharan<br>Africa | Static                              |                      | [1]    |
| Soil structure class           | --                     | HWSD                                              | 30-arc<br>second      | Global                | Static                              |                      | [12]   |
| Soil thickness                 | cm                     | S-World                                           | 30-arc<br>second      | Global                | Static                              |                      | [13]   |
| Solar radiation                | kJ/m <sup>2</sup> /day | WorldClim V.2.                                    | 30-arc<br>second      | Global                | Long-<br>term<br>monthly<br>average | 1950-2000            | [14]   |
| Stream length                  | m                      | HydroSHEDS                                        | 30 arc-<br>second     | Global                | Static                              |                      | [4]    |
| Temperature                    | °C                     | MOD11A1 V6                                        | 30-arc<br>second      | Global                | 1-day                               | 2000-<br>present     | [15]   |
| Watershed area                 | m <sup>2</sup>         | HydroSHEDS                                        | 30 arc-<br>second     | Global                | Static                              |                      | [4]    |
| Wind velocity                  | m/s                    | WorldClim V.2.                                    | 30-arc<br>second      | Global                | Long-<br>term<br>monthly<br>average | 1950-2000            | [14]   |

**Table S4.** An insecticide residue database was compiled from a literature review in Web of Knowledge. The table includes the search terms that were used to find studies that measured insecticide residues in soil, sediment, water and air. The following data were systematically extracted: year and month(s) of sampling, collection methods and depth, extraction method, quantification method, limit of quantification and detection, insecticide type and class, detected insecticide concentration and geographical coordinates.

---

'pyrethroid' AND spati\*' OR 'pyrethroid' AND 'map\*'

'organophos AND spati\*' OR 'organophos' AND 'map\*'

'carbamate' AND spati\*' OR 'carbamate' AND 'map\*'

'pyrethroid' AND 'watershed' OR 'run-off' OR 'groundwater' OR 'drift' OR 'deposition' OR 'precipitation' OR 'soil' OR 'sediment' OR 'coverage' OR 'atmosphere\*'

'organophos\* AND 'watershed' OR 'run-off' OR 'groundwater' OR 'drift' OR 'deposition' OR 'precipitation' OR 'soil' OR 'sediment' OR 'coverage' OR 'atmosphere\*'

'carbamate AND 'watershed' OR 'run-off' OR 'groundwater' OR 'drift' OR 'deposition' OR 'precipitation' OR 'soil' OR 'sediment' OR 'coverage' OR 'atmosphere\*'

'residu\*' AND 'pyrethroid' OR 'organophos\*' OR 'carbamate' AND 'COUNTRYNAME' NOT 'indoor residual spray\*'

---

## References

1. Hengl T, Mendes de Jesus J, Heuvelink GBM, Ruiperez Gonzalez M, Kilibarda M, Blagotic A, et al. SoilGrids250m: Global gridded soil information based on machine learning. *PLoS One*. 2017;12:e0169748.
2. Jarvis A, Reuter HI, Nelson A, Guevara E. Hole-filled SRTM for the globe Version 4. CGIAR-CSI SRTM 90m Database. 2008. Available from: <http://srtm.csi.cgiar.org>.
3. Weiss DJ, Atkinson PM, Bhatt S, Mappin B, Hay SI, Gething PW. An effective approach for gap-filling continental scale remotely sensed time-series. *ISPRS J Photogramm Remote Sens*. 2014;98:106–18.
4. Lehner B, Verdin K, Jarvis A. New global hydrography derived from spaceborne elevation data. *Eos, Trans Am Geophys Union*. 2008;89:93–4.
5. Fan Y, Li H, Miguez-Macho G. Global patterns of groundwater table depth. *Science* 2013; 339: 940-943.
6. Channan S, Collins K, Emanuel WR. Global mosaics of the standard MODIS land cover type data. University of Maryland and the Pacific Northwest National Laboratory, USA. 2014. Available from: <http://glcf.umd.edu/data/lc/>.
7. Trabucco A, Zomer RJ. Global Aridity Index (Global-Aridity) and Global Potential Evapo-Transpiration (Global-PET) Geospatial Database. CGIAR-CSI GeoPortal. 2009. Available from: <https://cgiarcsi.community/data/global-aridity-and-pet-database/>.
8. P Panagos P, Borrelli P, Meusburger K, Yu B, Klik A, Jae Lim K, et al. Global rainfall erosivity assessment based on high-temporal resolution rainfall records. *Sci Rep*. 2017;7:4175.
9. Kleist DT. An evaluation of hybrid variational-ensemble data assimilation for the NCEP GFS. University of Maryland-College Park; 2012.
10. Hengl T, Heuvelink GBM, Kempen B, Leenaars JGB, Walsh MG, Shepherd KD, et al. Mapping Soil Properties of Africa at 250 m Resolution: Random Forests Significantly Improve Current Predictions. *PLoS One*. 2015; 25;10:e0125814.
11. Mladenova IE, Bolten JD, Crow WT, Anderson MC, Hain CR, Johnson DM, et al. Intercomparison of Soil Moisture, Evaporative Stress, and Vegetation Indices for Estimating Corn and Soybean Yields Over the U.S. *IEEE J Sel Top Appl Earth Obs Remote Sens*. 2017;10:1328–43.
12. Fischer G, Nachtergaele F, Prieler S, Van Velthuizen, H.T. Verelst L, Wiberg D. Global Agro-ecological Zones Assessment for Agriculture (GAEZ 2008). IIASA, FAO. 2008. Available from: <http://www.fao.org/soils-portal/soil-survey/soil-maps-and-databases/harmonized-world-soil-database->

v12/en/.

13. Stoorvogel JJ, Bakkenes M, Temme AJAM, Batjes NH, ten Brink BJE. S-World: A Global Soil Map for Environmental Modelling. *L Degrad Dev.* 2017;28:22–33.
14. Fick SE, Hijmans RJ. WorldClim 2: new 1-km spatial resolution climate surfaces for global land areas. *Int J Climatol.* 2017;37:4302–15.
15. Wan Z, Hook S, Hulley G. MOD11A1 MODIS/Terra Land Surface Temperature/Emissivity Daily L3 Global 1km SIN Grid V006. NASA EOSDIS LP DAAC. 2015. Available from: <https://lpdaac.usgs.gov/node/819>.
